# Supplementary material for: Probing the influence of lactose fines, a USP modified induction port and modified DDU apparatus on the aerodynamic behavior of a fluticasone propionate dry powder inhaler
Source: Royal Society of Chemistry journal article supplement (doi:10.1039/c9nj01747j), 2019-01-01
Supplement: c9nj01747j1.pdf [file c9nj01747j1.pdf]

## Supplementary data

### Assay calculations

**1. Assay on as such basis** = [Assay on anhydrous basis x (100- water content)] /100

**2. Qty. to be dispensed** = [Standard quantity x 100 ]/ Assay on as such basis

Fluticasone propionate API assay in terms of anhydrous basis : 99.7 % w/w

Fluticasone propionate API water content : 0.15 % w/w

**1. Assay on as such basis** = [99.7 (100-0.15)] / 100 = 99.5505 %

**2. Molecular conversion** (to calculate standard quantity)

|                          |                   |
|--------------------------|-------------------|
| Fluticasone propionate = | Fluticasone       |
| 500.573 (mol. wt)        | 444.509 (mol. wt) |
| ‘X’                      | 100 mcg           |

‘X’ = [500.573\*100] / 444.509 = 112.6126 mcg

**3. Qty. to be dispensed** =

[112.6126\*100] / 99.5505 = 113.1211 mcg

[113.1211 mcg ~ 0.1131 mg]

### 4. Unit dose and batch size calculation

| Compositions | * Unit dose calculation (mg) | Batch size calculation (gm) |
|--------------|------------------------------|-----------------------------|
| FP           | 0.1131                       | 0.0452 (45.2 mg)            |
| Lactose      | 24.8869                      | 9.9548                      |
| Total        | 25.0000                      | 10.0000                     |

\*Dose per capsule (25 mg of each capsule contains 113.1211 mcg of fluticasone propionate means 100 mcg of fluticasone).

**Batch no. of all materials**

| <b>Materials</b>              | <b>Batch no.</b> | <b>Company</b>      |
|-------------------------------|------------------|---------------------|
| Lactohale® 200                | 100NT11          | DFE Pharma, Germany |
| Size 3 HPMC (Vcaps®) capsules | 9030024          | Capsugel, India     |
| Revolizer® device             | 38J17059         | Cipla, India        |
| Fluticasone propionate        | BWC150438        | Cipla, India        |
